# Supplementary material
Source: publisher figshare collection journal article supplement (https://acs.figshare.com/ndownloader/files/9105379)
Supplement: Supplementary file 1 [file 9105379]

# Supporting Information

## Dual-Functional Electrocatalyst Derived from Iron-Porphyrin-Encapsulated Metal–Organic Frameworks

*Jungwon Park,<sup>†a</sup> Hyunjoon Lee,<sup>†a</sup> Young Eun Bae,<sup>†c</sup> Kyoung Chul Park,<sup>a</sup> Hoon Ji,<sup>b</sup> Nak  
Cheon Jeong,<sup>b</sup> Min Hyung Lee,<sup>\*c</sup> Oh Joong Kwon,<sup>\*ad</sup> Chang Yeon Lee<sup>\*ad</sup>*

<sup>a</sup> Department of Energy and Chemical Engineering, Incheon National University, Incheon 22012, Republic of Korea. Email: [ojkwon@inu.ac.kr](mailto:ojkwon@inu.ac.kr), [cylee@inu.ac.kr](mailto:cylee@inu.ac.kr)

<sup>b</sup> Department of Emerging Materials Science, DGIST, Daegu 42988, Republic of Korea

<sup>c</sup> Department of Applied Chemistry, Kyung Hee University, Yongin, Gyeonggi 17104, Republic of Korea. Email: [minhlee@khu.ac.kr](mailto:minhlee@khu.ac.kr)

<sup>d</sup> Innovation Center for Chemical Engineering, Incheon National University, Incheon 22012, Republic of Korea

\* Corresponding author.

E-mail address: [cylee@inu.ac.kr](mailto:cylee@inu.ac.kr), [minhlee@khu.ac.kr](mailto:minhlee@khu.ac.kr), [ojkwon@inu.ac.kr](mailto:ojkwon@inu.ac.kr)

<sup>†</sup> These authors contributed equally

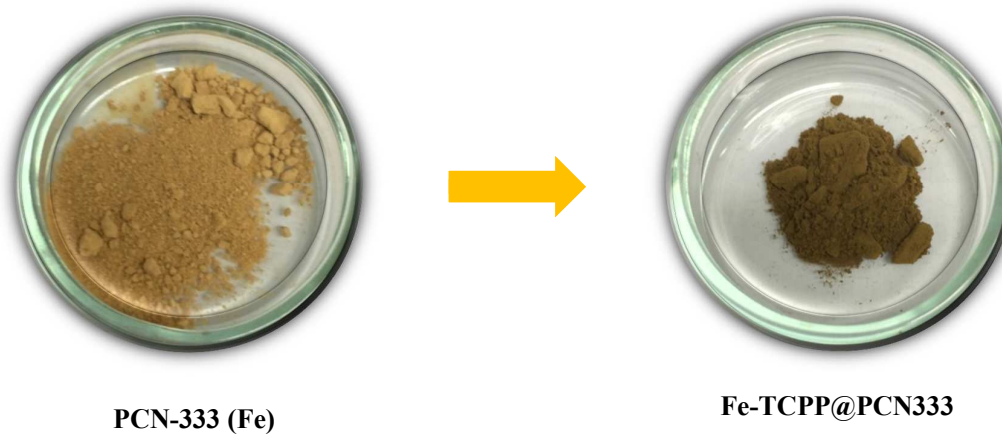

**Figure S1.** Photograph images of PCN-333 (Fe) and Fe-TCPP@PCN333.

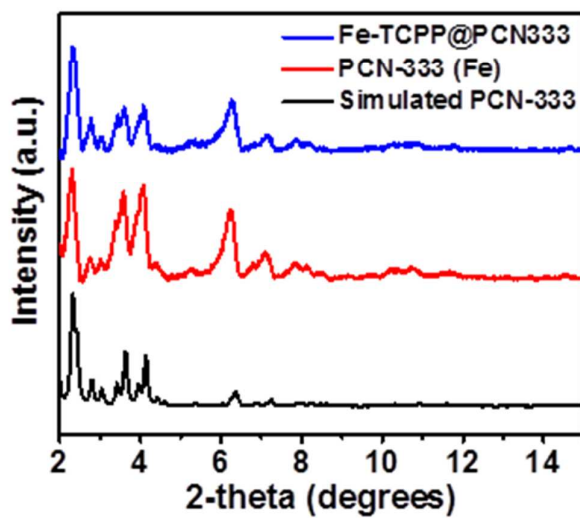

**Figure S2.** Powder X-ray diffraction patterns of PCN-333 (Fe) and Fe-TCPP@PCN333.

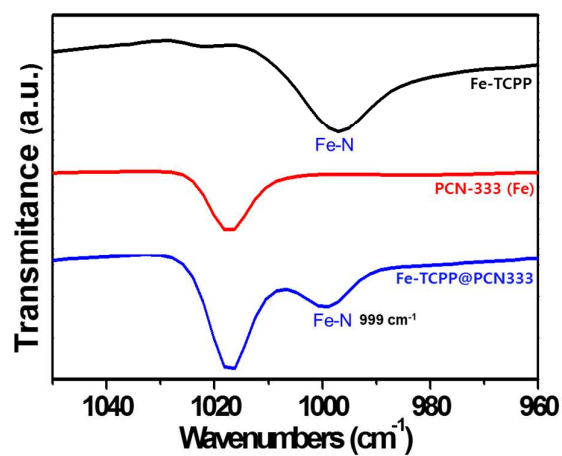

**Figure S3.** FTIR spectra of Fe-TCPP, PCN-333 (Fe) and Fe-TCPP@PCN333

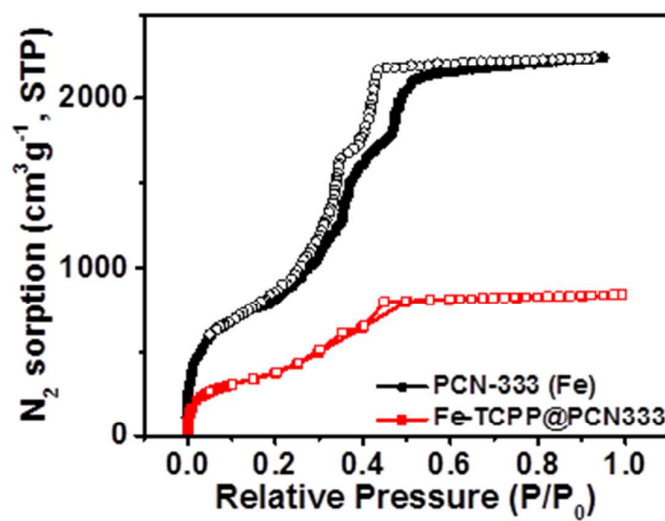

**Figure S4.** N<sub>2</sub> adsorption-desorption isotherms for PCN-333 (Fe) and Fe-TCPP@PCN333

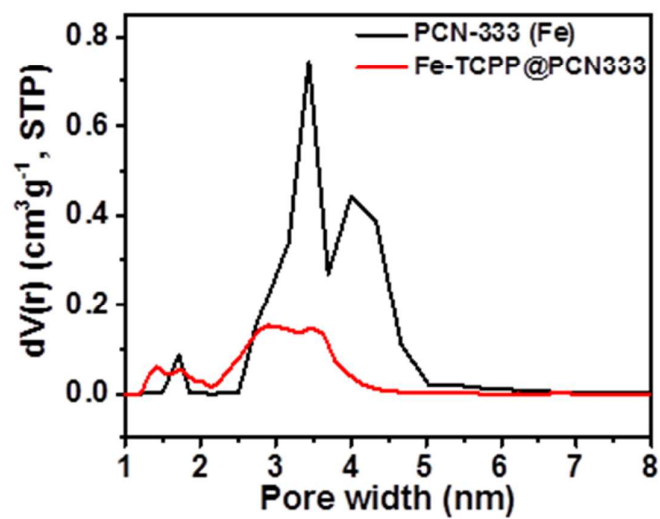

**Figure S5.** DFT pore size distribution for PCN-333 (Fe) and Fe-TCPP@PCN333 obtained from the N<sub>2</sub> isotherm measured at 77 K.

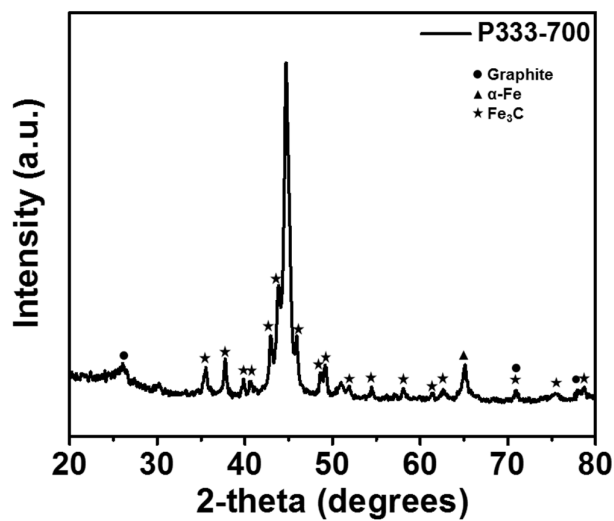

**Figure S6.** Powder X-ray diffraction pattern of P333-700.

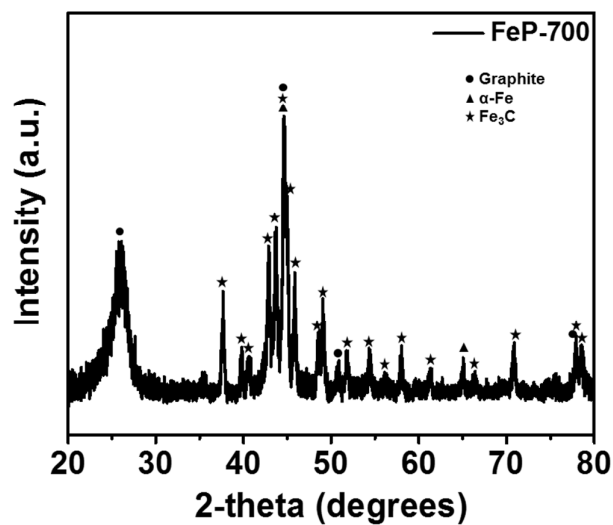

Figure S7. Powder X-ray diffraction pattern of FeP-700.

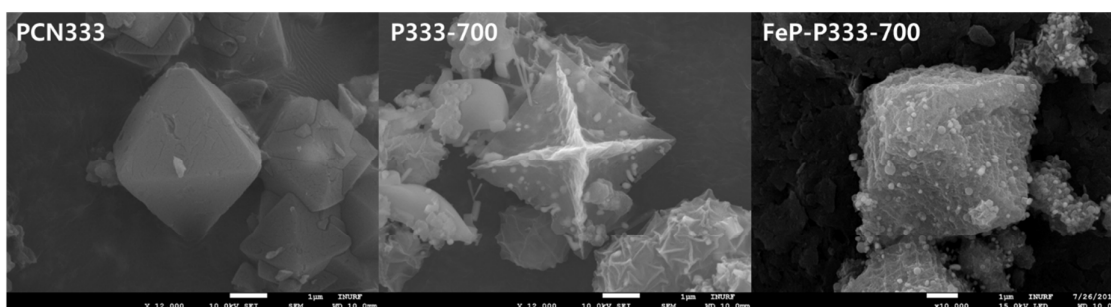

Figure S8. SEM image of PCN-333 (Fe), P333-700 and FeP-P333-700

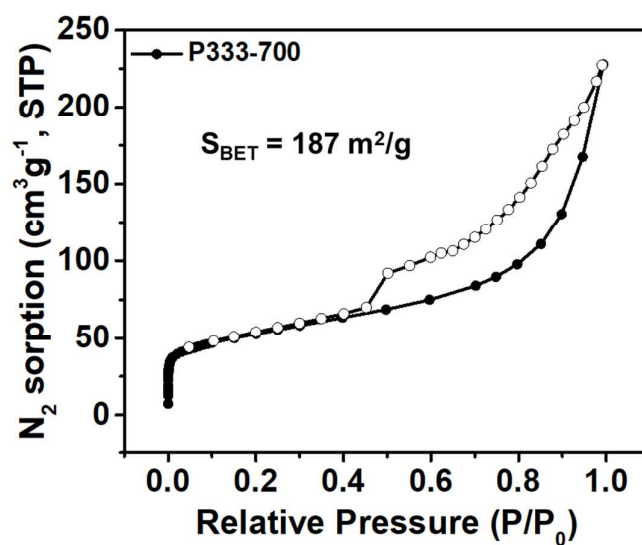

Figure S9. N<sub>2</sub> adsorption-desorption isotherms of P333-700.

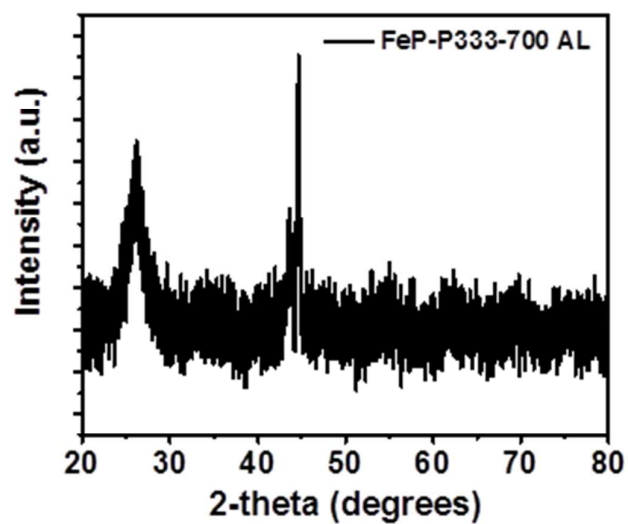

**Figure S10.** Powder X-ray diffraction pattern of FeP-P333-700 AL.

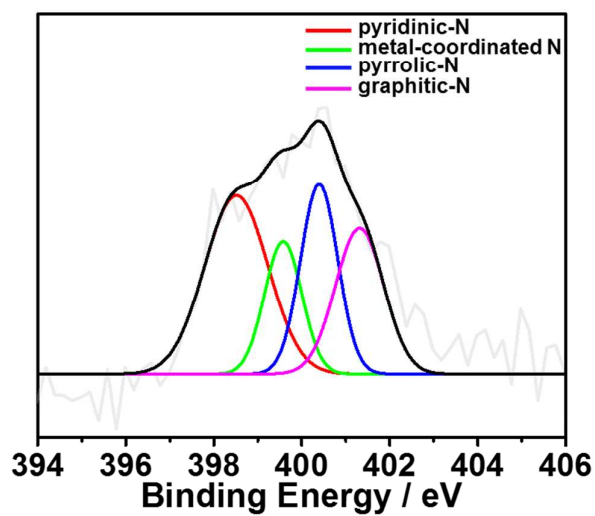

**Figure S11.** N 1s XPS spectra of FeP-P333-700 AL.

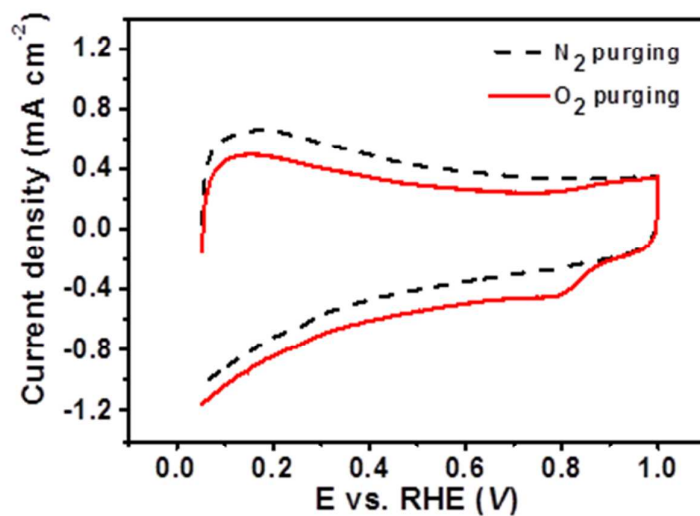

**Figure S12.** CVs of P333-700 in  $\text{N}_2$  and  $\text{O}_2$ -saturated 0.1 M aqueous KOH electrolyte solutions at scan rate of  $20 \text{ mVs}^{-1}$

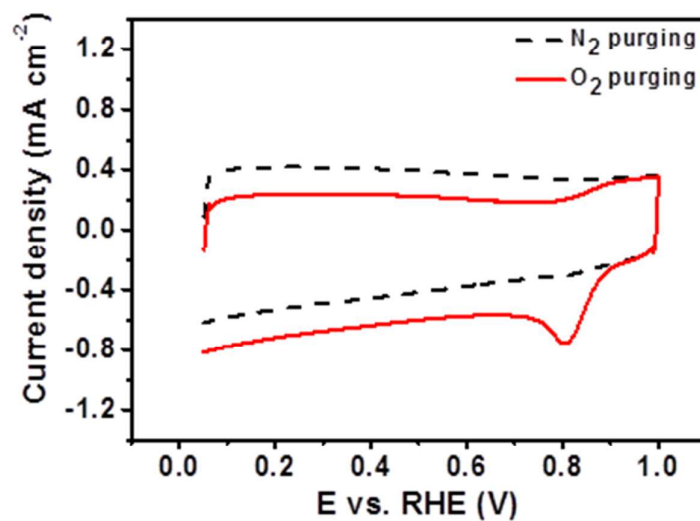

**Figure S13.** CVs of FeP-P333-700 AL in  $\text{N}_2$  and  $\text{O}_2$ -saturated 0.1 M aqueous KOH electrolyte solutions at scan rate of  $20 \text{ mVs}^{-1}$ .

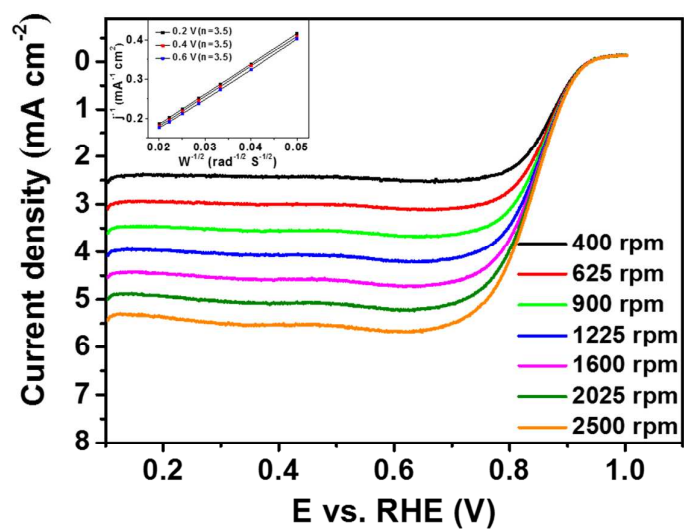

**Figure S14.** RDE LSVs curves of FeP-P333-700 AL at various speeds; inset shows corresponding Koutecky-Levich plots ( $j^{-1}$  vs  $\text{rpm}^{-1/2}$ )

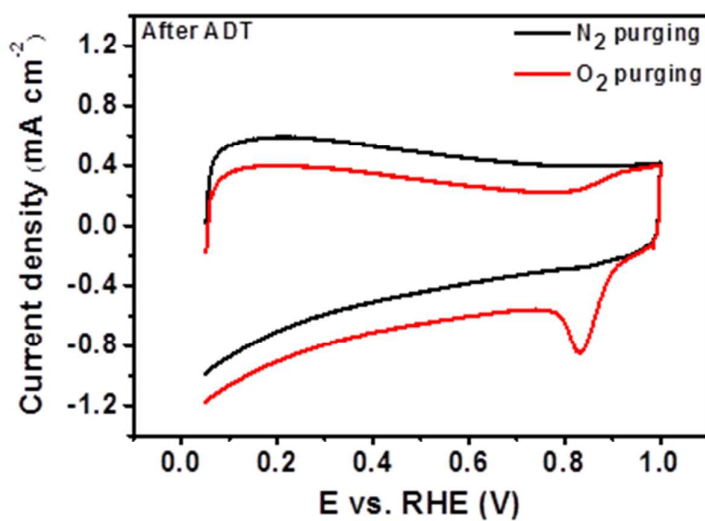

**Figure S15.** CVs of After ADT FeP-P333-700 in  $\text{N}_2$  and  $\text{O}_2$ -saturated 0.1 M aqueous KOH electrolyte solutions at scan rate of  $20 \text{ mVs}^{-1}$



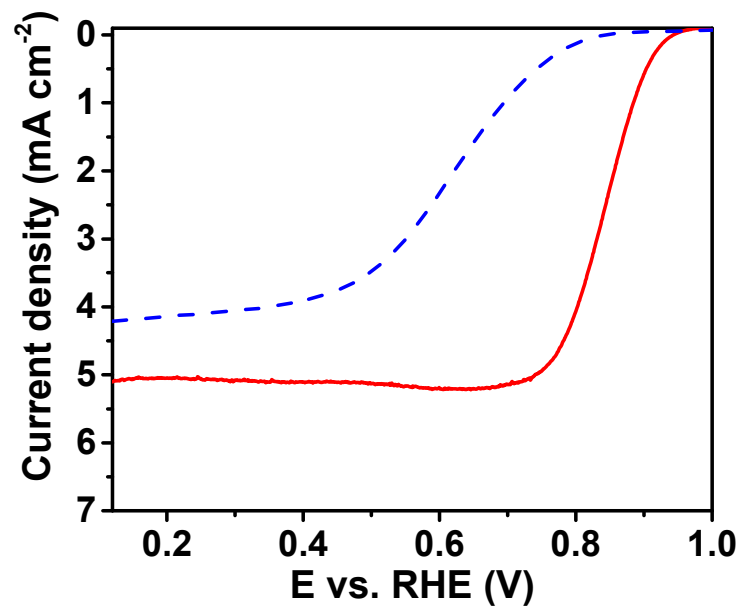

**Figure S16.** LSV curves of FeP-P333-700 (red solid line) and catalyst derived from physical mixture of metalloporphyrin and PCN-333 (blue dashed line) at a rotation rate of 1600 rpm in O<sub>2</sub>-saturated 0.1 M KOH solution

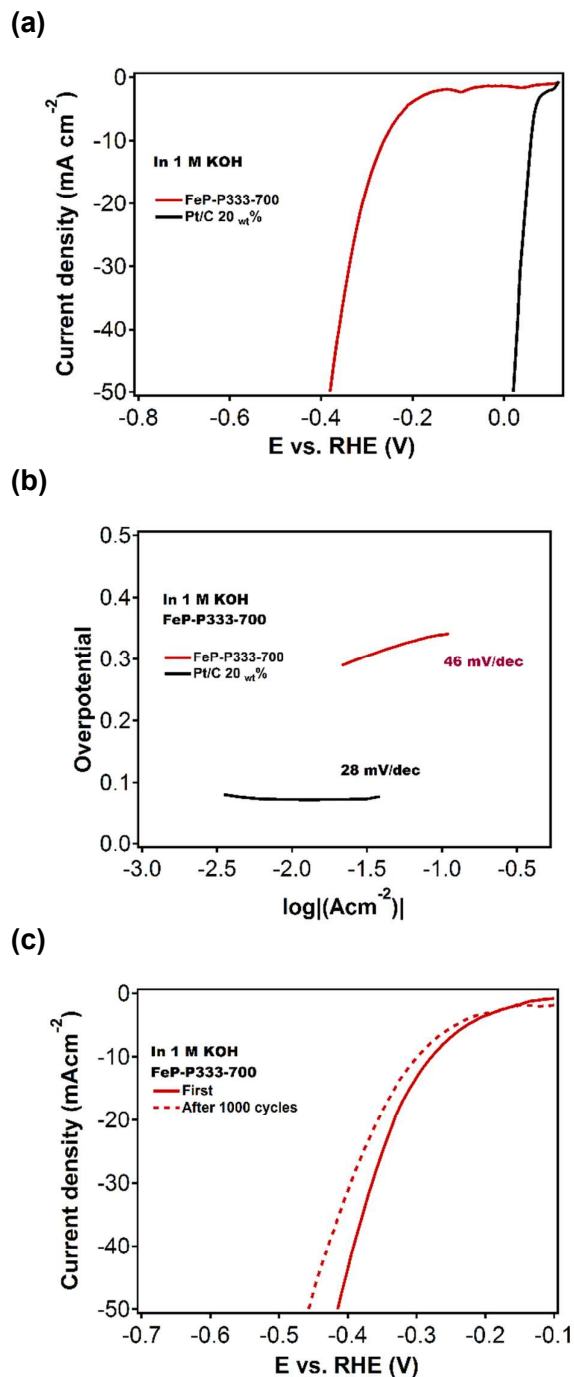

**Figure S17.** Electrochemical characterization of electrocatalysts FeP-P333-700 in basic electrolyte (1 M KOH, pH 14). (a) Polarization curves and (b) corresponding Tafel plots obtained from the polarization curves. (c) Durability test using consecutive 1000 cycles in 1 M KOH electrolyte with sweeping potential from -0.2 V to -1.0 V vs RHE .

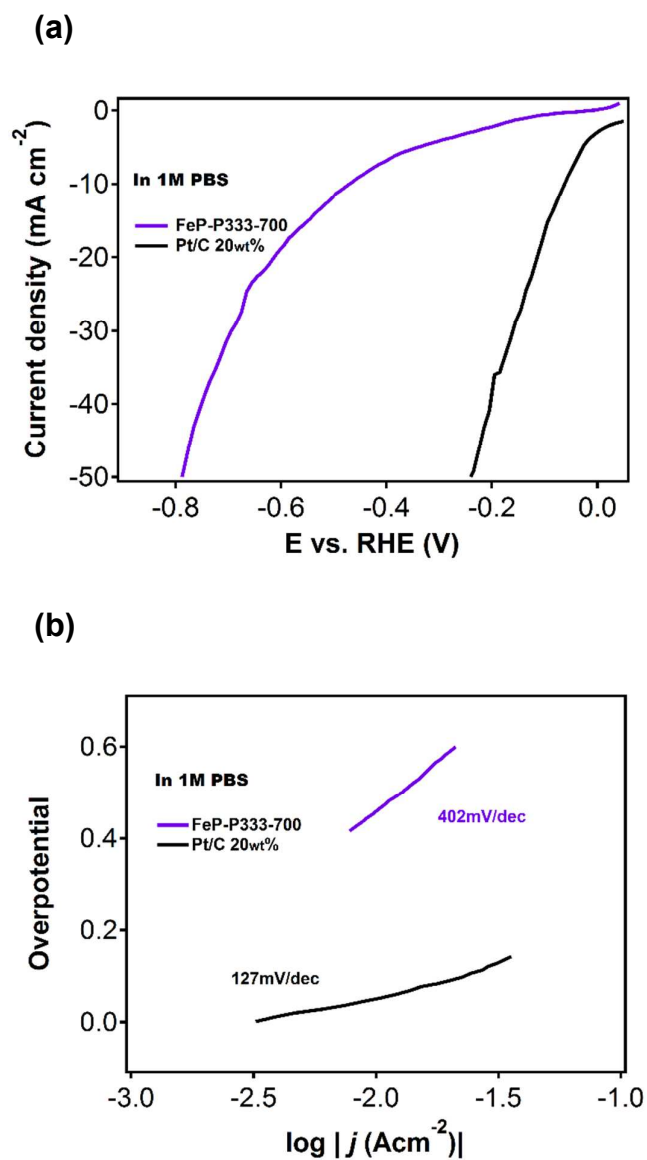

**Figure S18.** Electrochemical characterization of electrocatalysts FeP-P333-700 in neutral electrolyte (1 M PBS, pH 7). (a) Polarization curves and (b) corresponding Tafel plots obtained from the polarization curves.

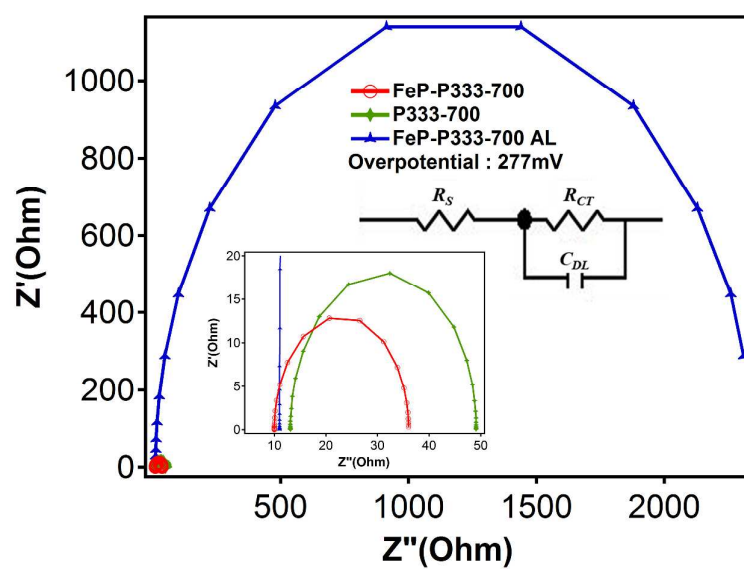

**Figure S19.** Nyquist plots of electrocatalysts that are fitted to the equivalent circuit shown in the inset.

**Table S1.** Impedance parameters of catalysts.

| samples         | $R_s$ ( $\Omega$ ) | $C_{DL}$ (mF) | $R_{CT}$ ( $\Omega$ ) |
|-----------------|--------------------|---------------|-----------------------|
| FeP-P333-700    | 9.99               | 0.73503       | 26.04                 |
| P333-700        | 13.12              | 0.06535       | 36.01                 |
| FeP-P333-700 AL | 11                 | 0.85875       | 2334                  |

**Table S2.** Catalytic performance comparison of catalysts in different pH condition.

| Overpotential<br>(E vs. RHE) | FeP-P333-700          |                        | Pt/C 20 <sub>wt</sub> % |                        |
|------------------------------|-----------------------|------------------------|-------------------------|------------------------|
|                              | 10 mA/cm <sup>2</sup> | 100 mA/cm <sup>2</sup> | 10 mA/cm <sup>2</sup>   | 100 mA/cm <sup>2</sup> |
| pH 0.1                       | 0.207                 | 0.357                  | 0.017                   | 0.147                  |
| pH 7                         | 0.420                 | 0.890                  | 0.065                   | 0.450                  |
| pH 14                        | 0.301                 | 0.480                  | 0.057                   | 0.022                  |
| Overpotential<br>(E vs. RHE) | P333-700              |                        | FeP-P333-700 AL         |                        |
|                              | 10 mA/cm <sup>2</sup> | 100 mA/cm <sup>2</sup> | 10 mA/cm <sup>2</sup>   | 100 mA/cm <sup>2</sup> |
| pH 0.1                       | 0.237                 | 0.412                  | 0.527                   | 0.727                  |

**Table S3.** Comparison of half-wave potential of the Fe<sub>3</sub>C based non-precious electrocatalysts in 0.1 M KOH electrolyte reported in the literatures.

| Catalyst                            | Half-wave potential<br>(V vs. RHE) | Electrolyte | Reference |
|-------------------------------------|------------------------------------|-------------|-----------|
| FeMo Carbide/NG-800                 | 0.642                              | 0.1 M KOH   | S1        |
| Fe-W-C                              | 0.727                              | 0.1 M KOH   | S2        |
| Carbonized porous cubes             | 0.78                               | 0.1 M KOH   | S3        |
| Fe <sub>3</sub> C-GNRs              | 0.78                               | 0.1 M KOH   | S4        |
| Fe-C/NG-10%-700-AL                  | 0.793                              | 0.1 M KOH   | S5        |
| Fe <sub>3</sub> C@N-C-900           | 0.806                              | 0.1 M KOH   | S6        |
| Fe <sub>3</sub> C@NG-800-0.2        | 0.81                               | 0.1 M KOH   | S7        |
| Fe-N-GNFs                           | 0.824                              | 0.1 M KOH   | S8        |
| Fe <sub>3</sub> C@NCNTs-800         | 0.825                              | 0.1 M KOH   | S9        |
| Fe <sub>3</sub> C/b-NCNT            | 0.83                               | 0.1 M KOH   | S10       |
| Fe <sub>3</sub> C/C-800             | 0.83                               | 0.1 M KOH   | S11       |
| Fe/Fe <sub>3</sub> C@C/RGO          | 0.83                               | 0.1 M KOH   | S12       |
| Fe/Fe <sub>3</sub> C/melamine/ N-KB | 0.83                               | 0.1 M KOH   | S13       |
| Fe-N-CNFs                           | 0.832                              | 0.1 M KOH   | S14       |
| Fe <sub>3</sub> C@N-CNT assemblies  | 0.85                               | 0.1 M KOH   | S15       |
| Fe <sub>3</sub> C/NG-800            | 0.86                               | 0.1 M KOH   | S16       |
| FeP@P333-700                        | 0.843                              | 0.1 M KOH   | This work |

## Reference :

- [S1] Chen, M.; Liu, J.; Zhou, W.; Lin, J.; Shen, Z. Nitrogen-doped Graphene-Supported Transition-Metals Carbide Electrocatalysts for Oxygen Reduction Reaction. *Sci. Rep.* **2015**, *5*, 10389-10398.
- [S2] Yang, J.; Xie, Y.; Wang, R.; Jiang, B.; Tian, C.; Mu, G.; Yin, J.; Wang, B.; Fu, H. Synergistic Effect of Tungsten Carbide and Palladium on Graphene for Promoted Ethanol Electrooxidation. *ACS Appl. Mater. Interfaces* **2013**, *5*, 6571–6579.
- [S3] Wu, Y.; Zhao, S.; Zhao, K.; Tu, T.; Zheng, J.; Chen, J.; Zhou, H.; Chen, D.; Li, S. Porous Fe-N<sub>x</sub>/C Hybrid Derived from Bi-Metal Organic Frameworks as High Efficient Electrocatalyst for Oxygen Reduction Reaction. *J. Power Sources* **2016**, *311*, 137-143.
- [S4] Fan, X.; Peng, Z.; Ye, R.; Zhou, H.; Guo, X. M<sub>3</sub>C (M: Fe, Co, Ni) Nanocrystals Encased in Graphene Nanoribbons: An Active and Stable Bifunctional Electrocatalyst for Oxygen Reduction and Hydrogen Evolution Reactions. *ACS Nano* **2015**, *9*, 7407–7418.
- [S5] Xue, J.; Zhao, L.; Dou, Z.; Yang, Y.; Guan, Y.; Zhu, Z.; Cui, L. Nitrogen-Doped 3D Porous Carbons with Iron Carbide Nanoparticles Encapsulated in Graphitic Layers Derived from Functionalized MOF as an Efficient Noble-Metal-Free Oxygen Reduction Electrocatalysts in Both Acidic and Alkaline Media. *RSC Adv.* **2016**, *6*, 110820–110830.
- [S6] Liu, Y.-L.; Xu X.-Y.; Sun, P.-C.; Chen, T.-H. N-Doped Porous Carbon Nanosheets with Embedded Iron Carbide Nanoparticles for Oxygen Reduction Reaction in Acidic Media. *Int. J. Hydrogen Energy* **2015**, *40*, 4531-4539.
- [S7] Jiang, H.; Yao, Y.; Zhu, Y.; Liu, Y.; Su, Y.; Yang, X.; Li, C. Iron Carbide Nanoparticles Encapsulated in Mesoporous Fe–N-Doped Graphene-Like Carbon Hybrids as Efficient Bifunctional Oxygen Electrocatalysts. *ACS Appl. Mater. Interfaces* **2015**, *7*, 21511–21520.
- [S8] Wu, J.; Ma, L.; Yadav, R. M.; Yang, Y.; Zhang, X.; Vajtai, R.; Lou, J.; Ajayan, P. M.

- Nitrogen-Doped Graphene with Pyridinic Dominance as a Highly Active and Stable Electrocatalyst for Oxygen Reduction. *ACS Appl. Mater. Interfaces* **2015**, 7, 14763–14769.
- [S9] Zhong, G.; Wang, H.; Yu, H.; Peng, F. Nitrogen Doped Carbon Nanotubes with Encapsulated Ferric Carbide as Excellent Electrocatalyst for Oxygen Reduction Reaction in Acid and Alkaline Media. *J. Power Sources* **2015**, 286, 495-503.
- [S10] Aijaz, A.; Masa, J.; Rösler, C.; Antoni, H.; Fischer, R. A.; Schuhmann, W.; Muhler, M. MOF-Templated Assembly Approach for Fe<sub>3</sub>C Nanoparticles Encapsulated in Bamboo-Like N-Doped CNTs: Highly Efficient Oxygen Reduction under Acidic and Basic Conditions. *Chem. Eur. J.* **2017**, 23, 1–7.
- [S11] Hu, Y.; Jensen, J. O.; Zhang, W.; Cleemann, L. N.; Xing, W.; Bjerrum, N. J.; Li, Q. Hollow Spheres of Iron Carbide Nanoparticles Encased in Graphitic Layers as Oxygen Reduction Catalysts. *Angew. Chem. Int. Ed.* **2014**, 53, 3675-3679.
- [S12] Hou, Y.; Huang, T.; Wen, Z.; Mao, S.; Cui, S.; Chen, J. Metal-Organic Framework-Derived Nitrogen-Doped Core-Shell-Structured Porous Fe/Fe<sub>3</sub>C@C Nanoboxes Supported on Graphene Sheets for Efficient Oxygen Reduction Reactions. *Adv. Energy Mater.* **2014**, 4, 1400337.
- [S13] Lee, J.-S.; Park, G. S.; Kim, S. T.; Liu, M.; Cho, J. A Highly Efficient Electrocatalyst for the Oxygen Reduction Reaction: N-Doped Ketjenblack Incorporated into Fe/Fe<sub>3</sub>C-Functionalized Melamine Foam. *Angew. Chem. Int. Ed.* **2013**, 52, 1026-1030.
- [S14] Wu, Z.-Y.; Xu, X.-X.; Hu, B.-C.; Liang, H.-W.; Lin, Y.; Chen, L.-F.; Yu, S. H. Iron Carbide Nanoparticles Encapsulated in Mesoporous Fe-N-Doped Carbon Nanofibers for Efficient Electrocatalysis. *Angew. Chem. Int. Ed.* **2015**, 54, 8179-8183.
- [S15] Guan, B. Y.; Yu, L.; Lou, X. W. A Dual-Metal–Organic-Framework Derived Electrocatalyst for Oxygen Reduction. *Energy Environ. Sci.* **2016**, 9, 3092-3096.

[S16] Xiao, M.; Zhu, J.; Feng, L.; Liu, C.; Xing, W. Meso/Macroporous Nitrogen-Doped Carbon Architectures with Iron Carbide Encapsulated in Graphitic Layers as an Efficient and Robust Catalyst for the Oxygen Reduction Reaction in Both Acidic and Alkaline Solutions. *Adv. Mater.* **2015**, 27, 2521-2527.
